# Supplementary material for: Nitrogen-doped carbon nanotubes encapsulate cobalt nanoparticles as efficient catalysts for aerobic and solvent-free selective oxidation of hydrocarbons
Source: Royal Society of Chemistry journal article supplement (doi:10.1039/c7gc00469a), 2017-01-01
Supplement: c7gc00469a1.pdf [file c7gc00469a1.pdf]

## Supporting Information

### **Nitrogen-doped carbon nanotubes encapsulate cobalt nanoparticles as efficient catalyst for aerobic and solvent-free selective oxidation of hydrocarbons**

Xiu Lin,<sup>a</sup> Zhenzhen Nie,<sup>a</sup> Liyun Zhang,<sup>b</sup> Shuchuan Mei,<sup>a</sup> Yuan Chen,<sup>a</sup> Bingsen Zhang,<sup>\*b</sup> Runliang Zhu<sup>c</sup> and Zhigang Liu<sup>\*a</sup>

<sup>a</sup> State Key Laboratory of Chemo/Biosensing and Chemometrics, School of Chemistry and Chemical Engineering, Hunan University, Changsha, 410082, China

<sup>b</sup> Shenyang National Laboratory for Materials Science Institute of Metal Research, Chinese Academy of Sciences, Shenyang, 110016, China

<sup>c</sup> Guangdong Provincial Key Laboratory of Mineral Physics and Material Research & Development, Guangzhou Institute of Geochemistry, Chinese Academy of Sciences, Guangzhou, 510640, China

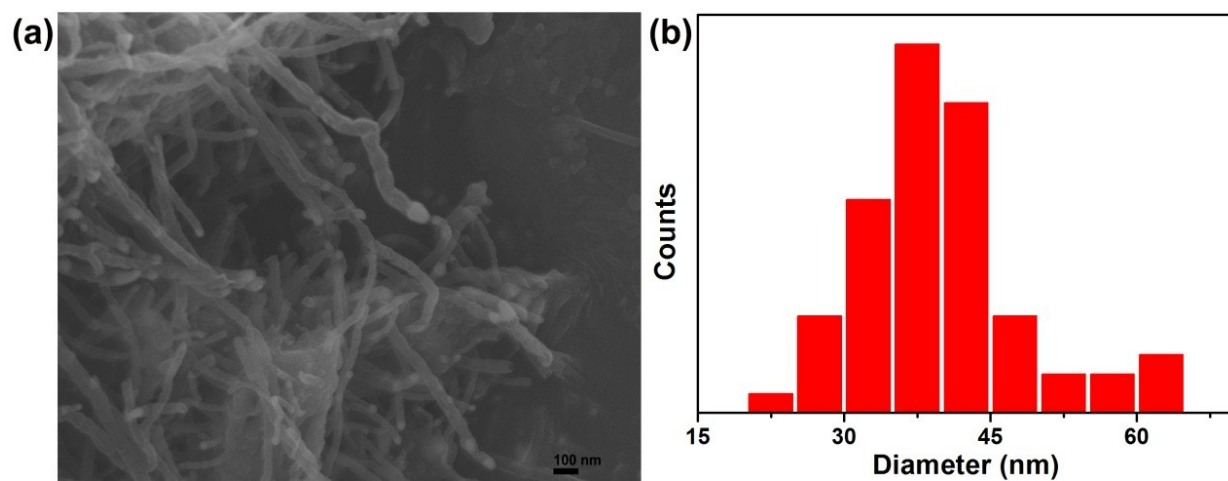

**Fig. S1** SEM image and the size distribution of carbon nanotubes for Co@GCNs-900.

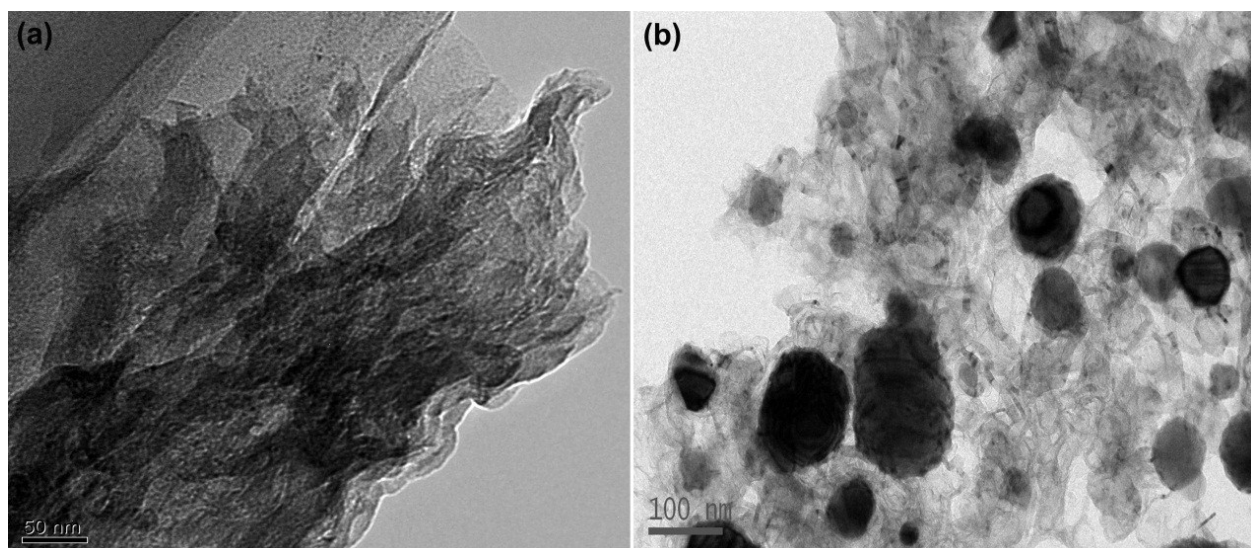

**Fig. S2** TEM images of MF-800 and Co/C-800.

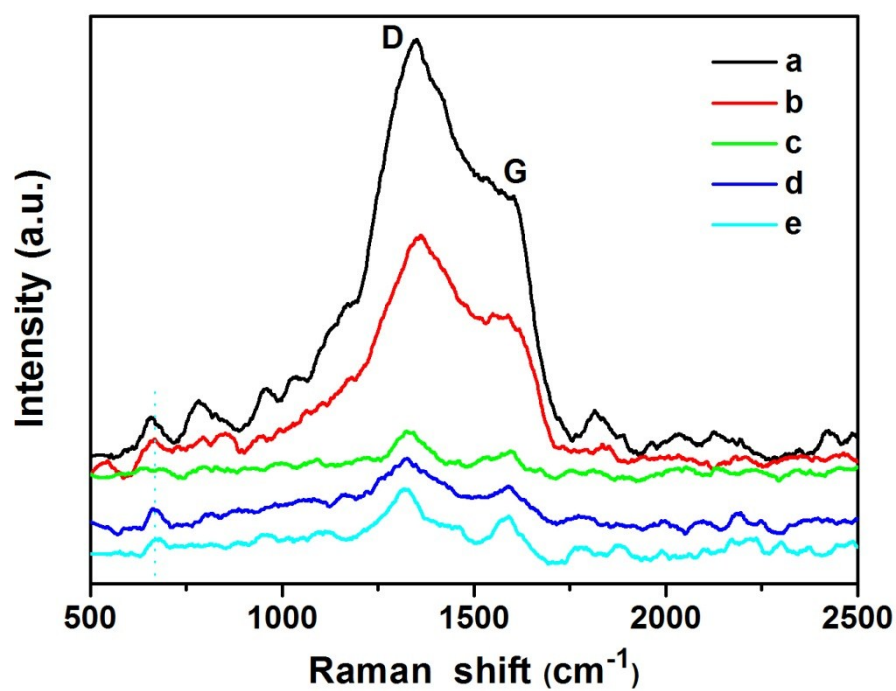

**Fig. S3** Raman spectra of (a) Co@GCNs-500, (b) Co@GCNs-600, (c) Co@GCNs-700, (d) Co@GCNs-800, and (e) Co@GCNs-900.

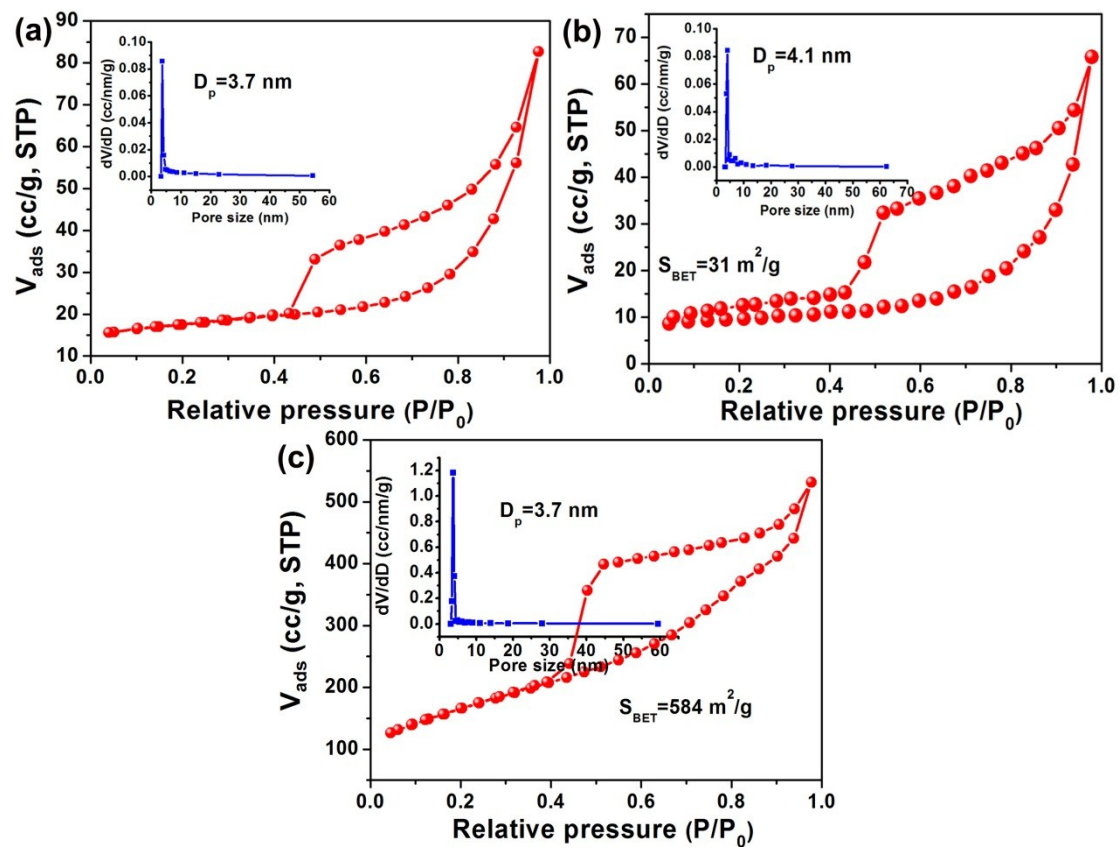

**Fig. S4** Nitrogen adsorption-desorption isotherms and pore size distribution of Co/C-800 (a), MF-800 (b), and Co@GCNs-800-AT.

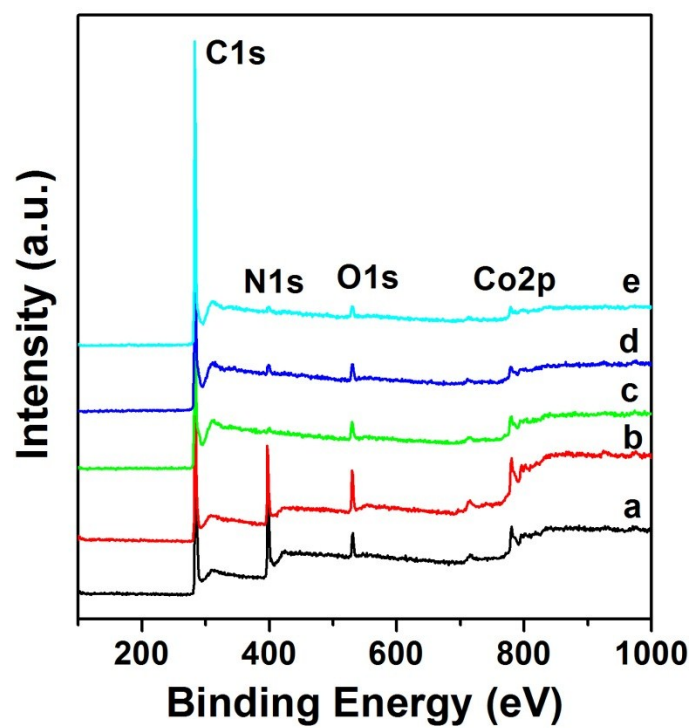

**Fig. S5.** XPS survey spectra of various Co@GCNs catalysts, a–e represent Co@GCNs–500, Co@GCNs–600, Co@GCNs–700, Co@GCNs–800, and Co@GCNs–900, respectively.

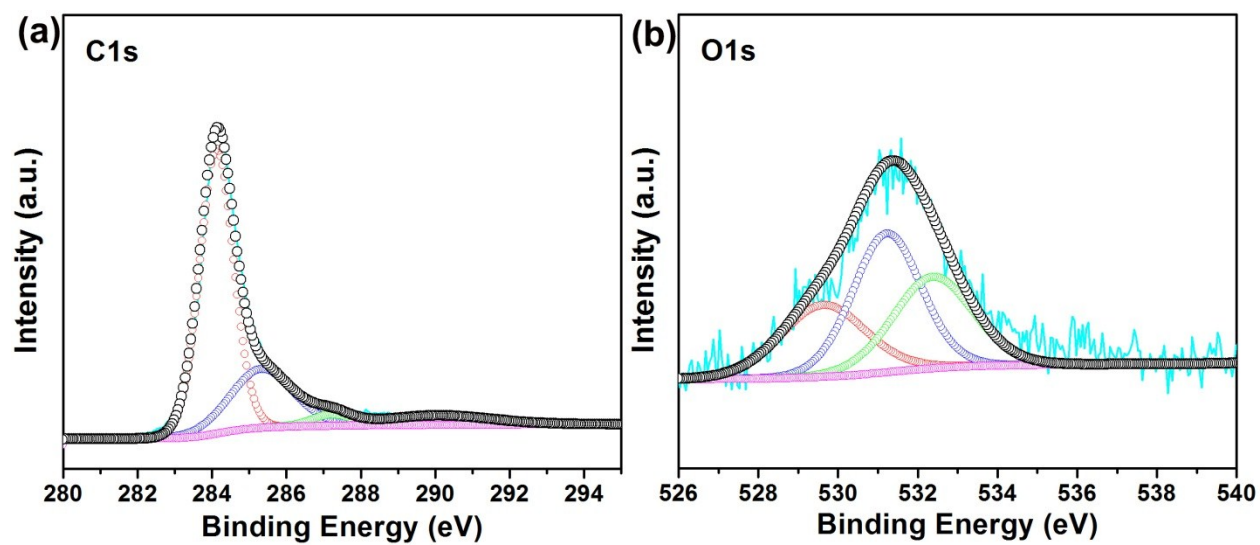

**Fig. S6** High-resolution C1s (a) and O1s (b) XPS spectrum of Co@GCNs-800.

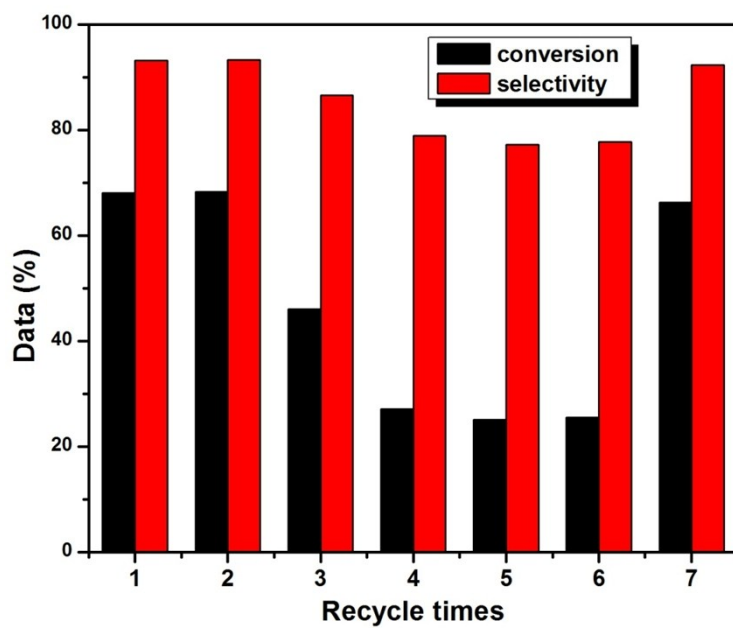

**Fig. S7** Reuse of Co@GCNs-800. Note: the catalyst for the seventh reaction comes from the calcination of the catalyst after the first six reactions.



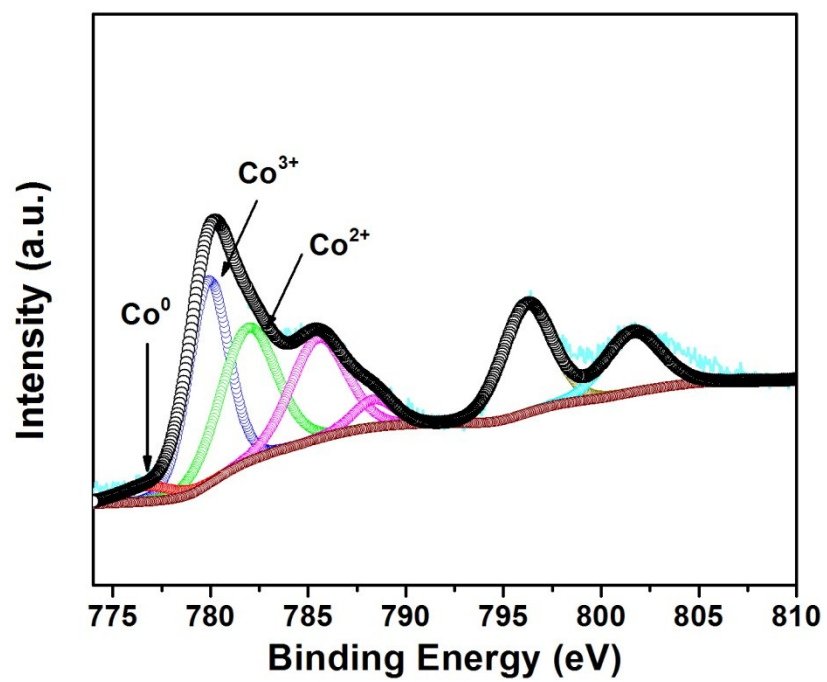

**Fig. S8** Co 2p spectrum of recycled Co@GCNs-800 after reaction.

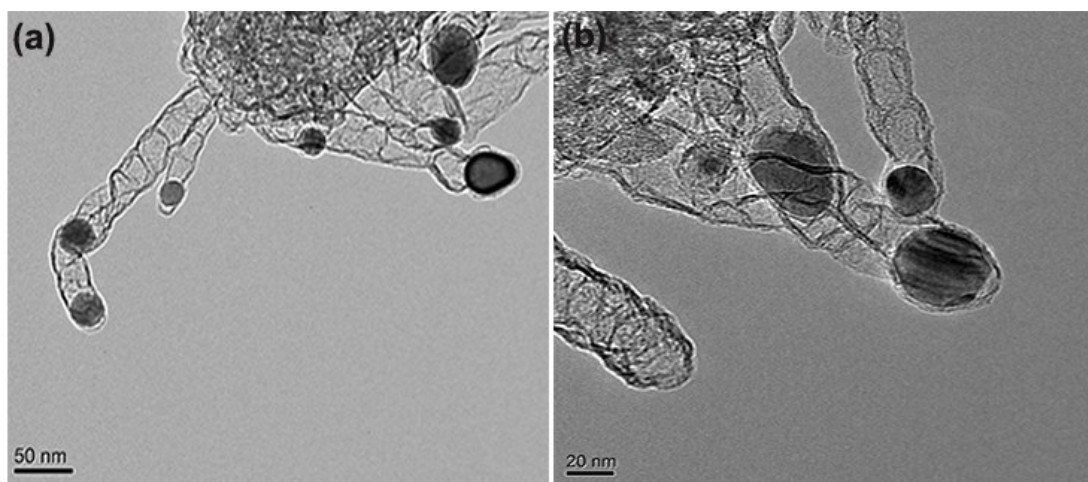

**Fig. S9** TEM images of recycled Co@GCNs-800 after reaction.

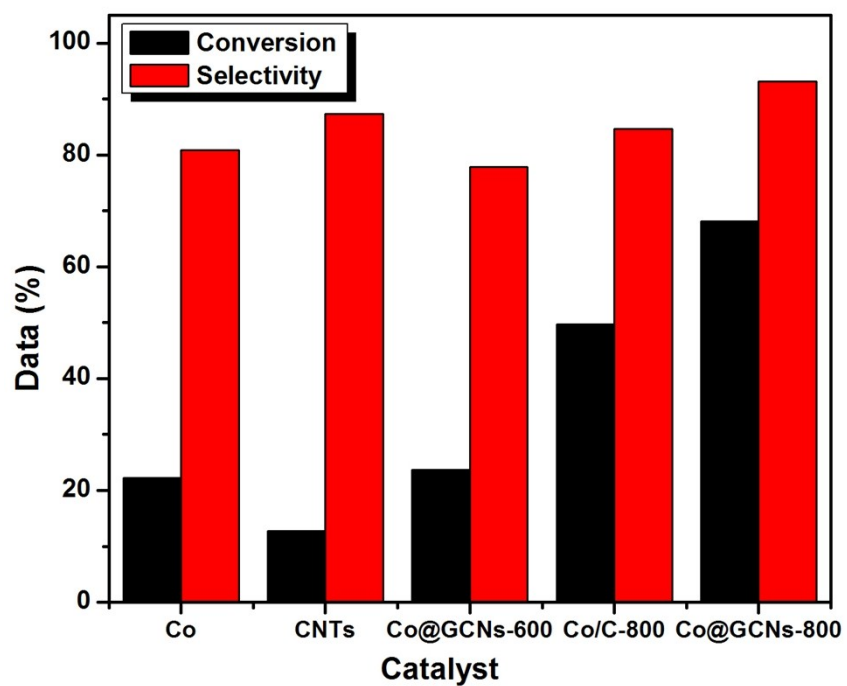

**Fig. S10** The comparison for conversion and selectivity of Co, CNTs, Co/CN-800, Co@GCNs-600, and Co@GCNs-800.
